# Supplementary material
Source: publisher site journal article supplement (https://www.spandidos-publications.com/432/downloadSupplementary)

Figure S1. Expression of CD69 and OX40 on PMA-activated Jurkut cells as revealed by flow cytometry. Green line, PMA 0 ng/ml; blue line, PMA 2.5 ng/ml; pink line, PMA 5 ng/ml; brown line, PMA 10 ng/ml; red line, PMA 20 ng/ml.

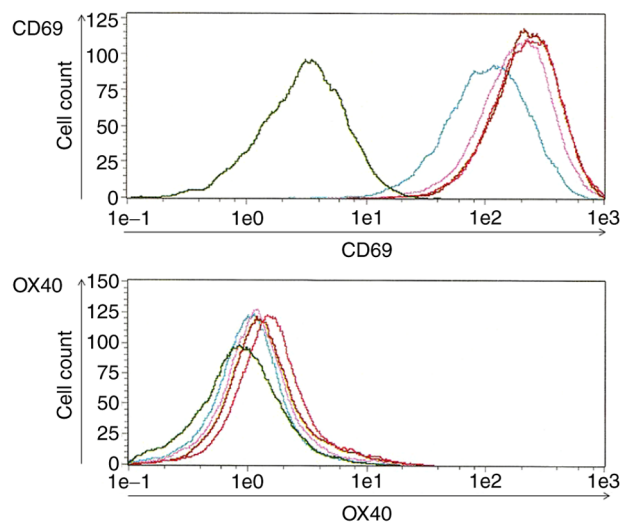

Supplement: Supplementary file 1 [file downloadSupplementary]
